# Supplementary material for: CARD15/NOD2, CD14 and Toll-like 4 Receptor Gene Polymorphisms in Saudi Patients with Crohn’s Disease
Source: Int J Mol Sci. 2012 Apr 2;13(4):4268–80. doi: 10.3390/ijms13044268 (PMC3344213; doi:10.3390/ijms13044268)
Supplement: Supplementary file 1 [file ijms-13-04268-s001.pdf]

# Supplementary Information

## 1. Analysis of the Association of the Three Variants of *CARD15/NOD2*, TLR4 (Thr399I) and CD14 –159C/T with Family History

**Table S1.** *CARD15/NOD2* Leu1007fsinsC frequency with family history.

|               |                   | FH     |        | Total  |
|---------------|-------------------|--------|--------|--------|
|               |                   | +      | –      |        |
| Leu1007fsinsC | Count             | 1      | 6      | 7      |
|               | W % Leu1007fsinsC | 14.3%  | 85.7%  | 100.0% |
|               | % within FH       | 11.1%  | 17.6%  | 16.3%  |
|               | Count             | 8      | 28     | 36     |
|               | M % Leu1007fsinsC | 22.2%  | 77.8%  | 100.0% |
|               | % within FH       | 88.9%  | 82.4%  | 83.7%  |
| Total         | Count             | 9      | 34     | 43     |
|               | % Leu1007fsinsC   | 20.9%  | 79.1%  | 100.0% |
|               | % within FH       | 100.0% | 100.0% | 100.0% |

**Table S2.** Analysis of association of *CARD15/NOD2* Leu1007fsinsC polymorphism with family history Using Chi-Square Tests.

|                                    | Value              | df | Asymp. Sig. (2-sided) | Exact Sig. (2-sided) | Exact Sig. (1-sided) |
|------------------------------------|--------------------|----|-----------------------|----------------------|----------------------|
| Pearson Chi-Square                 | 0.223 <sup>a</sup> | 1  | 0.637                 |                      |                      |
| Continuity Correction <sup>b</sup> | 0.000              | 1  | 1.000                 |                      |                      |
| Likelihood Ratio                   | 0.240              | 1  | 0.624                 |                      |                      |
| Fisher's Exact Test                |                    |    |                       | 1.000                | 0.543                |
| Linear-by-Linear Association       | 0.218              | 1  | 0.641                 |                      |                      |
| N of Valid Cases                   | 43                 |    |                       |                      |                      |

<sup>a</sup> 1 cells (25.0%) have expected count less than 5. The minimum expected count is 1.47; <sup>b</sup> Computed only for a 2 × 2 table.

**Table S3.** *CARD15/NOD2* Arg702Trp frequency with family history.

|                   |               | FH     |        | Total  |
|-------------------|---------------|--------|--------|--------|
|                   |               | +      | –      |        |
| Misense Arg702Trp | Count         | 1      | 5      | 6      |
|                   | W % Arg702Trp | 16.7%  | 83.3%  | 100.0% |
|                   | % within FH   | 11.1%  | 14.7%  | 14.0%  |
|                   | Count         | 8      | 29     | 37     |
|                   | M % Arg702Trp | 21.6%  | 78.4%  | 100.0% |
|                   | % within FH   | 88.9%  | 85.3%  | 86.0%  |
| Total             | Count         | 9      | 34     | 43     |
|                   | % Arg702Trp   | 20.9%  | 79.1%  | 100.0% |
|                   | % within FH   | 100.0% | 100.0% | 100.0% |

**Table S4.** Analysis of association of *CARD15/NOD2* Arg702Trp polymorphism with family history Using Chi-Square Tests.

|                                    | Value              | df | Asymp. Sig. (2-sided) | Exact Sig. (2-sided) | Exact Sig. (1-sided) |
|------------------------------------|--------------------|----|-----------------------|----------------------|----------------------|
| Pearson Chi-Square                 | 0.077 <sup>a</sup> | 1  | 0.782                 |                      |                      |
| Continuity Correction <sup>b</sup> | 0.000              | 1  | 1.000                 |                      |                      |
| Likelihood Ratio                   | 0.080              | 1  | 0.777                 |                      |                      |
| Fisher's Exact Test                |                    |    |                       | 1.000                | 0.631                |
| Linear-by-Linear Association       | 0.075              | 1  | 0.784                 |                      |                      |
| N of Valid Cases                   | 43                 |    |                       |                      |                      |

<sup>a</sup> 2 cells (50.0%) have expected count less than 5. The minimum expected count is 1.26; <sup>b</sup> Computed only for a 2 × 2 table.

**Table S5.** *CARD15/NOD2* G908R frequency with family history.

|                         |             |             | FH     |        | Total  |
|-------------------------|-------------|-------------|--------|--------|--------|
|                         |             |             | +      | −      |        |
| Missense Mutation (hHa) | W           | Count       | 0      | 5      | 5      |
|                         |             | % G908R     | 0.0%   | 100.0% | 100.0% |
|                         |             | % within FH | 0.0%   | 14.7%  | 11.6%  |
|                         | M           | Count       | 9      | 29     | 38     |
|                         |             | % G908R     | 23.7%  | 76.3%  | 100.0% |
|                         |             | % within FH | 100.0% | 85.3%  | 88.4%  |
| Total                   | Count       |             | 9      | 34     | 43     |
|                         | % G908R     |             | 20.9%  | 79.1%  | 100.0% |
|                         | % within FH |             | 100.0% | 100.0% | 100.0% |

**Table S6.** Analysis of association of *CARD15/NOD2* G908R polymorphism with family history using Chi-Square Tests.

|                                    | Value              | df | Asymp. Sig. (2-sided) | Exact Sig. (2-sided) | Exact Sig. (1-sided) |
|------------------------------------|--------------------|----|-----------------------|----------------------|----------------------|
| Pearson Chi-Square                 | 1.498 <sup>a</sup> | 1  | 0.221                 |                      |                      |
| Continuity Correction <sup>b</sup> | 0.408              | 1  | 0.523                 |                      |                      |
| Likelihood Ratio                   | 2.517              | 1  | 0.113                 |                      |                      |
| Fisher's Exact Test                |                    |    |                       | 0.566                | 0.289                |
| Linear-by-Linear Association       | 1.463              | 1  | 0.226                 |                      |                      |
| N of Valid Cases                   | 43                 |    |                       |                      |                      |

<sup>a</sup> 2 cells (50.0%) have expected count less than 5. The minimum expected count is 1.05; <sup>b</sup> Computed only for a 2 × 2 table.

**Table S7.** TLR4 Thr399Ile frequency with family history.

|        |                    | <b>FH</b> |        |              |
|--------|--------------------|-----------|--------|--------------|
|        |                    | +         | –      | <b>Total</b> |
| Hinf 1 | Count              | 1         | 20     | 21           |
|        | W % TLR4 Thr399Ile | 4.8%      | 95.2%  | 100.0%       |
|        | % within FH        | 11.1%     | 58.8%  | 48.8%        |
|        | Count              | 8         | 14     | 22           |
|        | M % TLR4 Thr399Ile | 36.4%     | 63.6%  | 100.0%       |
|        | % within FH        | 88.9%     | 41.2%  | 51.2%        |
| Total  | Count              | 9         | 34     | 43           |
|        | % TLR4 Thr399Ile   | 20.9%     | 79.1%  | 100.0%       |
|        | % within FH        | 100.0%    | 100.0% | 100.0%       |

**Table S8.** Analysis of association of TLR4 Thr399Ile polymorphism with family history using Chi-Square Tests.

|                                    | Value              | df | Asymp. Sig. (2-sided) | Exact Sig. (2-sided) | Exact Sig. (1-sided) |
|------------------------------------|--------------------|----|-----------------------|----------------------|----------------------|
| Pearson Chi-Square                 | 6.484 <sup>a</sup> | 1  | 0.011                 |                      |                      |
| Continuity Correction <sup>b</sup> | 4.715              | 1  | 0.030                 |                      |                      |
| Likelihood Ratio                   | 7.239              | 1  | 0.007                 |                      |                      |
| Fisher's Exact Test                |                    |    |                       | 0.021                | 0.013                |
| Linear-by-Linear Association       | 6.333              | 1  | 0.012                 |                      |                      |
| N of Valid Cases                   | 43                 |    |                       |                      |                      |

<sup>a</sup> 2 cells (50.0%) have expected count less than 5. The minimum expected count is 4.40; <sup>b</sup> Computed only for a 2 × 2 table.

**Table S9.** CD14 –159(C/T) frequency with family history.

|       |               | <b>FH</b> |        |              |
|-------|---------------|-----------|--------|--------------|
|       |               | +         | –      | <b>Total</b> |
| Hae   | Count         | 3         | 9      | 12           |
|       | W % –159(C/T) | 25.0%     | 75.0%  | 100.0%       |
|       | % within FH   | 33.3%     | 26.5%  | 27.9%        |
|       | Count         | 6         | 25     | 31           |
|       | M % –159(C/T) | 19.4%     | 80.6%  | 100.0%       |
|       | % within FH   | 66.7%     | 73.5%  | 72.1%        |
| Total | Count         | 9         | 34     | 43           |
|       | % –159(C/T)   | 20.9%     | 79.1%  | 100.0%       |
|       | % within FH   | 100.0%    | 100.0% | 100.0%       |

**Table S10.** Analysis of association of CD14-159(C/T) polymorphism with family history using Chi-Square Tests.

|                                    | Value              | df | Asymp. Sig. (2-sided) | Exact Sig. (2-sided) | Exact Sig. (1-sided) |
|------------------------------------|--------------------|----|-----------------------|----------------------|----------------------|
| Pearson Chi-Square                 | 0.167 <sup>a</sup> | 1  | 0.683                 |                      |                      |
| Continuity Correction <sup>b</sup> | 0.000              | 1  | 1.000                 |                      |                      |
| Likelihood Ratio                   | 0.162              | 1  | 0.687                 |                      |                      |
| Fisher's Exact Test                |                    |    |                       | 0.692                | 0.489                |
| Linear-by-Linear Association       | 0.163              | 1  | 0.687                 |                      |                      |
| N of Valid Cases                   | 43                 |    |                       |                      |                      |

<sup>a</sup> 1 cells (25.0%) have expected count less than 5. The minimum expected count is 2.51; <sup>b</sup> Computed only for a 2 × 2 table.

## 2. Analysis of the Association of the Three Variants of *CARD15/NOD2*, TLR4 (Thr399I) and CD14 –159C/T with Sex

**Table S11.** *CARD15/NOD2* Leu1007fsinsC frequency with sex.

|               |                 |                 | Sex    |        |        |
|---------------|-----------------|-----------------|--------|--------|--------|
|               |                 |                 | Male   | Female | Total  |
| Leu1007fsinsC | W               | Count           | 2      | 4      | 6      |
|               |                 | % Leu1007fsinsC | 33.3%  | 66.7%  | 100.0% |
|               |                 | % within Sex    | 7.1%   | 26.7%  | 14.0%  |
|               | M               | Count           | 26     | 11     | 37     |
|               |                 | % Leu1007fsinsC | 70.3%  | 29.7%  | 100.0% |
|               |                 | % within Sex    | 92.9%  | 73.3%  | 86.0%  |
| Total         | Count           | 28              | 15     | 43     |        |
|               | % Leu1007fsinsC | 65.1%           | 34.9%  | 100.0% |        |
|               | % within Sex    | 100.0%          | 100.0% | 100.0% |        |

**Table S12.** Analysis of association of *CARD15/NOD2* Leu1007fsinsC polymorphism with Sex using Chi-Square Tests.

|                                    | Value              | df | Asymp. Sig. (2-sided) | Exact Sig. (2-sided) | Exact Sig. (1-sided) |
|------------------------------------|--------------------|----|-----------------------|----------------------|----------------------|
| Pearson Chi-Square                 | 3.101 <sup>a</sup> | 1  | 0.078                 |                      |                      |
| Continuity Correction <sup>b</sup> | 1.688              | 1  | 0.194                 |                      |                      |
| Likelihood Ratio                   | 2.947              | 1  | 0.086                 |                      |                      |
| Fisher's Exact Test                |                    |    |                       | 0.161                | 0.099                |
| Linear-by-Linear Association       | 3.029              | 1  | 0.082                 |                      |                      |
| N of Valid Cases                   | 43                 |    |                       |                      |                      |

<sup>a</sup> 2 cells (50.0%) have expected count less than 5. The minimum expected count is 2.09; <sup>b</sup> Computed only for a 2 × 2 table.

**Table S13.** *CARD15/NOD2* Arg702Trp frequency with sex.

|           |              |              | Sex    |        |        |
|-----------|--------------|--------------|--------|--------|--------|
|           |              |              | Male   | Female | Total  |
| Arg702Trp | W            | Count        | 7      | 0      | 7      |
|           |              | % Arg702Trp  | 100.0% | 0.0%   | 100.0% |
|           |              | % within Sex | 25.0%  | 0.0%   | 16.3%  |
|           | M            | Count        | 21     | 15     | 36     |
|           |              | % Arg702Trp  | 58.3%  | 41.7%  | 100.0% |
|           |              | % within Sex | 75.0%  | 100.0% | 83.7%  |
| Total     | Count        |              | 28     | 15     | 43     |
|           | % Arg702Trp  |              | 65.1%  | 34.9%  | 100.0% |
|           | % within Sex |              | 100.0% | 100.0% | 100.0% |

**Table S14.** Analysis of association of *CARD15/NOD2* Arg702Trp polymorphism with sex using Chi-Square Tests.

|                                    | Value              | df | Asymp. Sig. (2-sided) | Exact Sig. (2-sided) | Exact Sig. (1-sided) |
|------------------------------------|--------------------|----|-----------------------|----------------------|----------------------|
| Pearson Chi-Square                 | 4.479 <sup>a</sup> | 1  | 0.034                 |                      |                      |
| Continuity Correction <sup>b</sup> | 2.833              | 1  | 0.092                 |                      |                      |
| Likelihood Ratio                   | 6.716              | 1  | 0.010                 |                      |                      |
| Fisher's Exact Test                |                    |    |                       | 0.077                | 0.037                |
| Linear-by-Linear Association       | 4.375              | 1  | 0.036                 |                      |                      |
| N of Valid Cases                   | 43                 |    |                       |                      |                      |

<sup>a</sup> 2 cells (50.0%) have expected count less than 5. The minimum expected count is 2.44; <sup>b</sup> Computed only for a 2 × 2 table.

**Table S15.** *CARD15/NOD2* G908R frequency with sex.

|       |              |              | Sex    |        |        |
|-------|--------------|--------------|--------|--------|--------|
|       |              |              | Male   | Female | Total  |
| G908R | W            | Count        | 3      | 2      | 5      |
|       |              | % G908R      | 60.0%  | 40.0%  | 100.0% |
|       |              | % within Sex | 10.7%  | 13.3%  | 11.6%  |
|       | M            | Count        | 25     | 13     | 38     |
|       |              | % G908R      | 65.8%  | 34.2%  | 100.0% |
|       |              | % within Sex | 89.3%  | 86.7%  | 88.4%  |
| Total | Count        |              | 28     | 15     | 43     |
|       | % G908R      |              | 65.1%  | 34.9%  | 100.0% |
|       | % within Sex |              | 100.0% | 100.0% | 100.0% |

**Table S16.** Analysis of association of *CARD15/NOD2* G908R polymorphism with sex using Chi-Square Tests.

|                                    | Value              | df | Asymp. Sig. (2-sided) | Exact Sig. (2-sided) | Exact Sig. (1-sided) |
|------------------------------------|--------------------|----|-----------------------|----------------------|----------------------|
| Pearson Chi-Square                 | 0.065 <sup>a</sup> | 1  | 0.798                 |                      |                      |
| Continuity Correction <sup>b</sup> | 0.000              | 1  | 1.000                 |                      |                      |
| Likelihood Ratio                   | 0.064              | 1  | 0.800                 |                      |                      |
| Fisher's Exact Test                |                    |    |                       | 1.000                | 0.579                |
| Linear-by-Linear Association       | 0.064              | 1  | 0.801                 |                      |                      |
| N of Valid Cases                   | 43                 |    |                       |                      |                      |

<sup>a</sup> 2 cells (50.0%) have expected count less than 5. The minimum expected count is 1.74; <sup>b</sup> Computed only for a 2 × 2 table.

**Table S17.** TLR4 Thr399Ile frequency with sex.

|           |                 | Sex    |        |        |
|-----------|-----------------|--------|--------|--------|
|           |                 | Male   | Female | Total  |
| Thr399Ile | Count           | 14     | 8      | 22     |
|           | W % Thr399Ile   | 63.6%  | 36.4%  | 100.0% |
|           | % within Sex    | 50.0%  | 53.3%  | 51.2%  |
|           | Count           | 14     | 7      | 21     |
|           | M % Thr399Ile   | 66.7%  | 33.3%  | 100.0% |
|           | % within Sex    | 50.0%  | 46.7%  | 48.8%  |
| Total     | Count           | 28     | 15     | 43     |
|           | % within Hinf 1 | 65.1%  | 34.9%  | 100.0% |
|           | % within Sex    | 100.0% | 100.0% | 100.0% |

**Table S18.** Analysis of association of TLR4 Thr399Ile polymorphism with sex using Chi-Square Tests.

|                                    | Value              | df | Asymp. Sig. (2-sided) | Exact Sig. (2-sided) | Exact Sig. (1-sided) |
|------------------------------------|--------------------|----|-----------------------|----------------------|----------------------|
| Pearson Chi-Square                 | 0.043 <sup>a</sup> | 1  | 0.835                 |                      |                      |
| Continuity Correction <sup>b</sup> | 0.000              | 1  | 1.000                 |                      |                      |
| Likelihood Ratio                   | 0.043              | 1  | 0.835                 |                      |                      |
| Fisher's Exact Test                |                    |    |                       | 1.000                | 0.545                |
| Linear-by-Linear Association       | 0.042              | 1  | 0.837                 |                      |                      |
| N of Valid Cases                   | 43                 |    |                       |                      |                      |

<sup>a</sup> 0 cells (.0%) have expected count less than 5. The minimum expected count is 7.33; <sup>b</sup> Computed only for a 2 × 2 table.

**Table S19.** CD14 –159(C/T) frequency with sex.

|           |               | Sex    |        |        |
|-----------|---------------|--------|--------|--------|
|           |               | Male   | Female | Total  |
| -159(C/T) | Count         | 6      | 6      | 12     |
|           | W % –159(C/T) | 50.0%  | 50.0%  | 100.0% |
|           | % within Sex  | 21.4%  | 40.0%  | 27.9%  |
|           | Count         | 22     | 9      | 31     |
|           | M % –159(C/T) | 71.0%  | 29.0%  | 100.0% |
|           | % within Sex  | 78.6%  | 60.0%  | 72.1%  |
| Total     | Count         | 28     | 15     | 43     |
|           | % –159(C/T)   | 65.1%  | 34.9%  | 100.0% |
|           | % within Sex  | 100.0% | 100.0% | 100.0% |

**Table S20.** Analysis of association of CD14 –159(C/T) polymorphism with sex using Chi-Square Tests.

|                                    | Value              | df | Asymp. Sig. (2-sided) | Exact Sig. (2-sided) | Exact Sig. (1-sided) |
|------------------------------------|--------------------|----|-----------------------|----------------------|----------------------|
| Pearson Chi-Square                 | 1.674 <sup>a</sup> | 1  | 0.196                 |                      |                      |
| Continuity Correction <sup>b</sup> | 0.879              | 1  | 0.349                 |                      |                      |
| Likelihood Ratio                   | 1.631              | 1  | 0.202                 |                      |                      |
| Fisher's Exact Test                |                    |    |                       | 0.287                | 0.174                |
| Linear-by-Linear Association       | 1.635              | 1  | 0.201                 |                      |                      |
| N of Valid Cases                   | 43                 |    |                       |                      |                      |

<sup>a</sup> 1 cells (25.0%) have expected count less than 5. The minimum expected count is 4.19; <sup>b</sup> Computed only for a 2 × 2 table.

### 3. Analysis of the Association of the Three Variants of *CARD15/NOD2*, *TLR4* (Thr399I) and CD14–159C/T with Phenotypes

**Table S21.** *CARD15/NOD2* Leu1007fsinsC frequency with phenotypes.

|               |                    | Phenotype    |             |               |        |
|---------------|--------------------|--------------|-------------|---------------|--------|
|               |                    | Inflammatory | Fistulizing | Fibrostenotic | Total  |
| Leu1007fsinsC | Count              | 3            | 2           | 0             | 5      |
|               | W % Leu1007fsinsC  | 60.0%        | 40.0%       | 0.0%          | 100.0% |
|               | % within Phenotype | 21.4%        | 10.0%       | 0.0%          | 12.2%  |
|               | Count              | 11           | 18          | 7             | 36     |
|               | M % Leu1007fsinsC  | 30.6%        | 50.0%       | 19.4%         | 100.0% |
|               | % within Phenotype | 78.6%        | 90.0%       | 100.0%        | 87.8%  |
|               | Count              | 14           | 20          | 7             | 41     |
|               | % Leu1007fsinsC    | 34.1%        | 48.8%       | 17.1%         | 100.0% |
|               | % within Phenotype | 100.0%       | 100.0%      | 100.0%        | 100.0% |

**Table S22.** Analysis of association of *CARD15/NOD2* Leu1007fsinsC polymorphism with phenotypes using Chi-Square Tests.

|                              | Value              | df | Asymp. Sig. (2-sided) |
|------------------------------|--------------------|----|-----------------------|
| Pearson Chi-Square           | 2.177 <sup>a</sup> | 2  | 0.337                 |
| Likelihood Ratio             | 2.854              | 2  | 0.240                 |
| Linear-by-Linear Association | 2.119              | 1  | 0.145                 |
| N of Valid Cases             | 41                 |    |                       |

<sup>a</sup> 3 cells (50.0%) have expected count less than 5. The minimum expected count is 0.85.

**Table S23.** *CARD15/NOD2* Arg702Trp frequency with phenotypes.

|           |                    | Phenotype    |             |               |        |
|-----------|--------------------|--------------|-------------|---------------|--------|
|           |                    | Inflammatory | Fistulizing | Fibrostenotic | Total  |
| Arg702Trp | Count              | 1            | 4           | 1             | 6      |
|           | W % Arg702Trp      | 16.7%        | 66.7%       | 16.7%         | 100.0% |
|           | % within Phenotype | 7.1%         | 20.0%       | 14.3%         | 14.6%  |
|           | Count              | 13           | 16          | 6             | 35     |
|           | M % Arg702Trp      | 37.1%        | 45.7%       | 17.1%         | 100.0% |
|           | % within Phenotype | 92.9%        | 80.0%       | 85.7%         | 85.4%  |
| Total     | Count              | 14           | 20          | 7             | 41     |
|           | % Arg702Trp        | 34.1%        | 48.8%       | 17.1%         | 100.0% |
|           | % within Phenotype | 100.0%       | 100.0%      | 100.0%        | 100.0% |

**Table S24.** Analysis of association of *CARD15/NOD2* Arg702Trp polymorphism with phenotypes using Chi-Square Tests.

|                              | Value              | df | Asymp. Sig. (2-sided) |
|------------------------------|--------------------|----|-----------------------|
| Pearson Chi-Square           | 1.091 <sup>a</sup> | 2  | 0.580                 |
| Likelihood Ratio             | 1.175              | 2  | 0.556                 |
| Linear-by-Linear Association | 0.414              | 1  | 0.520                 |
| N of Valid Cases             | 41                 |    |                       |

<sup>a</sup> 3 cells (50.0%) have expected count less than 5. The minimum expected count is 1.02.

**Table S25.** *CARD15/NOD2* G908R frequency with phenotypes.

|       |                    | Phenotype    |             |               |        |
|-------|--------------------|--------------|-------------|---------------|--------|
|       |                    | Inflammatory | Fistulizing | Fibrostenotic | Total  |
| G908R | Count              | 3            | 1           | 1             | 5      |
|       | W % G908R          | 60.0%        | 20.0%       | 20.0%         | 100.0% |
|       | % within Phenotype | 21.4%        | 5.0%        | 14.3%         | 12.2%  |
|       | Count              | 11           | 19          | 6             | 36     |
|       | M % G908R          | 30.6%        | 52.8%       | 16.7%         | 100.0% |
|       | % within Phenotype | 78.6%        | 95.0%       | 85.7%         | 87.8%  |
| Total | Count              | 14           | 20          | 7             | 41     |
|       | % G908R            | 34.1%        | 48.8%       | 17.1%         | 100.0% |
|       | % within Phenotype | 100.0%       | 100.0%      | 100.0%        | 100.0% |

**Table S26.** Analysis of association of *CARD15/NOD2* G908R polymorphism phenotypes using Chi-Square Tests.

|                              | Value              | df | Asymp. Sig. (2-sided) |
|------------------------------|--------------------|----|-----------------------|
| Pearson Chi-Square           | 2.110 <sup>a</sup> | 2  | 0.348                 |
| Likelihood Ratio             | 2.175              | 2  | 0.337                 |
| Linear-by-Linear Association | 0.605              | 1  | 0.437                 |
| N of Valid Cases             | 41                 |    |                       |

<sup>a</sup> 3 cells (50.0%) have expected count less than 5. The minimum expected count is 0.85.

**Table S27.** TLR4 Thr399Ile frequency with phenotypes.

|           |                    |                    | Phenotype    |             |               |        |
|-----------|--------------------|--------------------|--------------|-------------|---------------|--------|
|           |                    |                    | Inflammatory | Fistulizing | Fibrostenotic | Total  |
| Thr399Ile | W                  | Count              | 8            | 9           | 3             | 20     |
|           |                    | % Thr399Ile        | 40.0%        | 45.0%       | 15.0%         | 100.0% |
|           |                    | % within Phenotype | 57.1%        | 45.0%       | 42.9%         | 48.8%  |
|           | M                  | Count              | 6            | 11          | 4             | 21     |
|           |                    | % Thr399Ile        | 28.6%        | 52.4%       | 19.0%         | 100.0% |
|           |                    | % within Phenotype | 42.9%        | 55.0%       | 57.1%         | 51.2%  |
| Total     | Count              |                    | 14           | 20          | 7             | 41     |
|           | % Thr399Ile        |                    | 34.1%        | 48.8%       | 17.1%         | 100.0% |
|           | % within Phenotype |                    | 100.0%       | 100.0%      | 100.0%        | 100.0% |

**Table S28.** Analysis of association of TLR4 Thr399Ile polymorphism with phenotypes Using Chi-Square Tests.

|                              | Value              | df | Asymp. Sig. (2-sided) |
|------------------------------|--------------------|----|-----------------------|
| Pearson Chi-Square           | 0.605 <sup>a</sup> | 2  | 0.739                 |
| Likelihood Ratio             | 0.606              | 2  | 0.739                 |
| Linear-by-Linear Association | 0.496              | 1  | 0.481                 |
| N of Valid Cases             | 41                 |    |                       |

<sup>a</sup> 2 cells (33.3%) have expected count less than 5. The minimum expected count is 3.41.

**Table S29.** CD14 -159(C/T) frequency with phenotypes.

|           |                    |                    | Phenotype    |             |               |        |
|-----------|--------------------|--------------------|--------------|-------------|---------------|--------|
|           |                    |                    | Inflammatory | Fistulizing | Fibrostenotic | Total  |
| -159(C/T) | W                  | Count              | 6            | 4           | 2             | 12     |
|           |                    | % -159(C/T)        | 50.0%        | 33.3%       | 16.7%         | 100.0% |
|           |                    | % within Phenotype | 42.9%        | 20.0%       | 28.6%         | 29.3%  |
|           | M                  | Count              | 8            | 16          | 5             | 29     |
|           |                    | % -159(C/T)        | 27.6%        | 55.2%       | 17.2%         | 100.0% |
|           |                    | % within Phenotype | 57.1%        | 80.0%       | 71.4%         | 70.7%  |
| Total     | Count              |                    | 14           | 20          | 7             | 41     |
|           | % -159(C/T)        |                    | 34.1%        | 48.8%       | 17.1%         | 100.0% |
|           | % within Phenotype |                    | 100.0%       | 100.0%      | 100.0%        | 100.0% |

**Table S30.** Analysis of association of CD14 –159(C/T) polymorphism with phenotypes Using Chi-Square Tests.

|                              | Value              | df | Asymp. Sig. (2-sided) |
|------------------------------|--------------------|----|-----------------------|
| Pearson Chi-Square           | 2.080 <sup>a</sup> | 2  | 0.353                 |
| Likelihood Ratio             | 2.059              | 2  | 0.357                 |
| Linear-by-Linear Association | 0.906              | 1  | 0.341                 |
| N of Valid Cases             | 41                 |    |                       |

<sup>a</sup> 3 cells (50.0%) have expected count less than 5. The minimum expected count is 2.05.

#### 4. Analysis of the Association of the Three Variants of *CARD15/NOD2* , TLR4 (Thr399I) and CD14–159C/T with Family History

**Table S31.** *CARD15/NOD2* Leu1007fsinsC frequency with smoking.

|               |                  |                  | Smoking |        | Total  |
|---------------|------------------|------------------|---------|--------|--------|
|               |                  |                  | Yes     | No     |        |
| Leu1007fsinsC | W                | Count            | 0       | 6      | 6      |
|               |                  | % Leu1007fsinsC  | 0.0%    | 100.0% | 100.0% |
|               |                  | % within Smoking | 0.0%    | 17.1%  | 15.4%  |
|               | M                | Count            | 4       | 29     | 33     |
|               |                  | % Leu1007fsinsC  | 12.1%   | 87.9%  | 100.0% |
|               |                  | % within Smoking | 100.0%  | 82.9%  | 84.6%  |
| Total         | Count            |                  | 4       | 35     | 39     |
|               | % Leu1007fsinsC  |                  | 10.3%   | 89.7%  | 100.0% |
|               | % within Smoking |                  | 100.0%  | 100.0% | 100.0% |

**Table S32.** Analysis of association of *CARD15/NOD2* Leu1007fsinsC polymorphism with family smoking Using Chi-Square Tests.

|                                    | Value              | df | Asymp. Sig. (2-sided) | Exact Sig. (2-sided) | Exact Sig. (1-sided) |
|------------------------------------|--------------------|----|-----------------------|----------------------|----------------------|
| Pearson Chi-Square                 | 0.810 <sup>a</sup> | 1  | 0.368                 |                      |                      |
| Continuity Correction <sup>b</sup> | 0.028              | 1  | 0.866                 |                      |                      |
| Likelihood Ratio                   | 1.417              | 1  | 0.234                 |                      |                      |
| Fisher's Exact Test                |                    |    |                       | 1.000                | 0.498                |
| Linear-by-Linear Association       | 0.790              | 1  | 0.374                 |                      |                      |
| N of Valid Cases                   | 39                 |    |                       |                      |                      |

<sup>a</sup> 2 cells (50.0%) have expected count less than 5. The minimum expected count is 0.62;

<sup>b</sup> Computed only for a 2 × 2 table.

**Table S33.** *CARD15/NOD2* Arg702Trp frequency with smoking.

|           |                  | Smoking |        | Total  |
|-----------|------------------|---------|--------|--------|
|           |                  | Yes     | No     |        |
| Arg702Trp | Count            | 2       | 4      | 6      |
|           | W % Arg702Trp    | 33.3%   | 66.7%  | 100.0% |
|           | % within Smoking | 50.0%   | 11.4%  | 15.4%  |
|           | Count            | 2       | 31     | 33     |
|           | M % Arg702Trp    | 6.1%    | 93.9%  | 100.0% |
|           | % within Smoking | 50.0%   | 88.6%  | 84.6%  |
| Total     | Count            | 4       | 35     | 39     |
|           | % Arg702Trp      | 10.3%   | 89.7%  | 100.0% |
|           | % within Smoking | 100.0%  | 100.0% | 100.0% |

**Table S34.** Analysis of association of *CARD15/NOD2* Arg702Trp polymorphism with smoking using Chi-Square Tests.

|                                    | Value              | df | Asymp. Sig. (2-sided) | Exact Sig. (2-sided) | Exact Sig. (1-sided) |
|------------------------------------|--------------------|----|-----------------------|----------------------|----------------------|
| Pearson Chi-Square                 | 4.103 <sup>a</sup> | 1  | 0.043                 |                      |                      |
| Continuity Correction <sup>b</sup> | 1.675              | 1  | 0.196                 |                      |                      |
| Likelihood Ratio                   | 3.065              | 1  | 0.080                 |                      |                      |
| Fisher's Exact Test                |                    |    |                       | 0.104                | 0.104                |
| Linear-by-Linear Association       | 3.997              | 1  | 0.046                 |                      |                      |
| N of Valid Cases                   | 39                 |    |                       |                      |                      |

<sup>a</sup> 2 cells (50.0%) have expected count less than 5. The minimum expected count is 0.62;

<sup>b</sup> Computed only for a 2 × 2 table.

**Table S35.** *CARD15/NOD2* G908R frequency with smoking.

|       |                  | Smoking |        | Total  |
|-------|------------------|---------|--------|--------|
|       |                  | Yes     | No     |        |
| G908R | Count            | 1       | 2      | 3      |
|       | W % G908R        | 33.3%   | 66.7%  | 100.0% |
|       | % within Smoking | 25.0%   | 5.7%   | 7.7%   |
|       | Count            | 3       | 33     | 36     |
|       | M % G908R (hHa)  | 8.3%    | 91.7%  | 100.0% |
|       | % within Smoking | 75.0%   | 94.3%  | 92.3%  |
| Total | Count            | 4       | 35     | 39     |
|       | % G908R          | 10.3%   | 89.7%  | 100.0% |
|       | % within Smoking | 100.0%  | 100.0% | 100.0% |

**Table S36.** Analysis of association of *CARD15/NOD2* G908R polymorphism with smoking using Chi-Square Tests.

|                                    | Value              | df | Asymp. Sig. (2-sided) | Exact Sig. (2-sided) | Exact Sig. (1-sided) |
|------------------------------------|--------------------|----|-----------------------|----------------------|----------------------|
| Pearson Chi-Square                 | 1.880 <sup>a</sup> | 1  | 0.170                 |                      |                      |
| Continuity Correction <sup>b</sup> | 0.145              | 1  | 0.703                 |                      |                      |
| Likelihood Ratio                   | 1.322              | 1  | 0.250                 |                      |                      |
| Fisher's Exact Test                |                    |    |                       | 0.284                | 0.284                |
| Linear-by-Linear Association       | 1.832              | 1  | 0.176                 |                      |                      |
| N of Valid Cases                   | 39                 |    |                       |                      |                      |

<sup>a</sup> 3 cells (75.0%) have expected count less than 5. The minimum expected count is 0.31;

<sup>b</sup> Computed only for a 2 × 2 table.

**Table S37.** TLR4 Thr399Ile frequency with smoking.

|           |                  | Smoking |        |        |
|-----------|------------------|---------|--------|--------|
|           |                  | Yes     | No     | Total  |
| Thr399Ile | Count            | 1       | 17     | 18     |
|           | W % Thr399Ile    | 5.6%    | 94.4%  | 100.0% |
|           | % within Smoking | 25.0%   | 48.6%  | 46.2%  |
|           | Count            | 3       | 18     | 21     |
|           | M % Thr399Ile    | 14.3%   | 85.7%  | 100.0% |
|           | % within Smoking | 75.0%   | 51.4%  | 53.8%  |
| Total     | Count            | 4       | 35     | 39     |
|           | % Thr399Ile      | 10.3%   | 89.7%  | 100.0% |
|           | % within Smoking | 100.0%  | 100.0% | 100.0% |

**Table S38.** Analysis of association of TLR4 Thr399Ile polymorphism with smoking using Chi-Square Tests.

|                                    | Value              | df | Asymp. Sig. (2-sided) | Exact Sig. (2-sided) | Exact Sig. (1-sided) |
|------------------------------------|--------------------|----|-----------------------|----------------------|----------------------|
| Pearson Chi-Square                 | 0.803 <sup>a</sup> | 1  | 0.370                 |                      |                      |
| Continuity Correction <sup>b</sup> | 0.134              | 1  | 0.714                 |                      |                      |
| Likelihood Ratio                   | 0.844              | 1  | 0.358                 |                      |                      |
| Fisher's Exact Test                |                    |    |                       | 0.609                | 0.364                |
| Linear-by-Linear Association       | 0.782              | 1  | 0.377                 |                      |                      |
| N of Valid Cases                   | 0.39               |    |                       |                      |                      |

<sup>a</sup> 2 cells (50.0%) have expected count less than 5. The minimum expected count is 1.85; <sup>b</sup> Computed only for a 2 × 2 table.

**Table S39.** CD14 –159(C/T) frequency with smoking.

|               |                   | Smoking          |        | Total  |
|---------------|-------------------|------------------|--------|--------|
|               |                   | Yes              | No     |        |
| CD14-159(C/T) | Count             | 1                | 9      | 10     |
|               | W % –159(C/T)     | 10.0%            | 90.0%  | 100.0% |
|               | % within Smoking  | 25.0%            | 25.7%  | 25.6%  |
|               | Count             | 3                | 26     | 29     |
|               | M % –159(C/T)     | 10.3%            | 89.7%  | 100.0% |
|               | % within Smoking  | 75.0%            | 74.3%  | 74.4%  |
|               | Count             | 4                | 35     | 39     |
|               | Total % –159(C/T) | 10.3%            | 89.7%  | 100.0% |
|               |                   | % within Smoking | 100.0% | 100.0% |

**Table S40.** Analysis of association of *CARD15/NOD2* Leu1007fsinsC polymorphism with smoking 0.35 Using Chi-Square Tests.

|                                    | Value              | df | Asymp. Sig. (2-sided) | Exact Sig. (2-sided) | Exact Sig. (1-sided) |
|------------------------------------|--------------------|----|-----------------------|----------------------|----------------------|
| Pearson Chi-Square                 | 0.001 <sup>a</sup> | 1  | 0.975                 |                      |                      |
| Continuity Correction <sup>b</sup> | 0.000              | 1  | 1.000                 |                      |                      |
| Likelihood Ratio                   | 0.001              | 1  | 0.975                 |                      |                      |
| Fisher's Exact Test                |                    |    |                       | 1.000                | 0.733                |
| Linear-by-Linear Association       | 0.001              | 1  | 0.976                 |                      |                      |
| N of Valid Cases                   | 39                 |    |                       |                      |                      |

<sup>a</sup> 2 cells (50.0%) have expected count less than 5. The minimum expected count is 1.03; <sup>b</sup> Computed only for a 2 × 2 table.

© 2012 by the authors; licensee MDPI, Basel, Switzerland. This article is an open access article distributed under the terms and conditions of the Creative Commons Attribution license (<http://creativecommons.org/licenses/by/3.0/>).
